# Supplementary material
Source: publisher site journal article supplement (https://www.dovepress.com/article/434795)
Supplement: Supplementary file 1 [file get_supplementary_file.php]

## Presence of breast cancer information recorded in United Kingdom primary care databases: comparison of CPRD Aurum and CPRD GOLD

Supplementary Table 1. Malignant breast cancer, mastectomy, and breast cancer drug prescription codes in CPRD Aurum and CPRD GOLD for study population selection

| Malignant Breast Cancer Diagnoses |                                                             |                        |                                                             |
|-----------------------------------|-------------------------------------------------------------|------------------------|-------------------------------------------------------------|
| CPRD Aurum - Medcodes             |                                                             | CPRD GOLD – Read codes |                                                             |
| M1210642019                       | Malignant neoplasm of female breast                         | B34..00                | Malignant neoplasm of female breast                         |
| M880261000006119                  | Carcinoma breast                                            | B34..99                | Carcinoma breast                                            |
| M53185100000619                   | Ca female breast                                            | B34..11                | Ca female breast                                            |
| M289137018                        | Malignant neoplasm of nipple and areola of female breast    | B340.00                | Malignant neoplasm of nipple and areola of female breast    |
| M155417012                        | Malignant neoplasm of nipple of female breast               | B340000                | Malignant neoplasm of nipple of female breast               |
| M155089014                        | Malignant neoplasm of areola of female breast               | B340100                | Malignant neoplasm of areola of female breast               |
| M289140018                        | Malignant neoplasm of nipple or areola of female breast NOS | B340z00                | Malignant neoplasm of nipple or areola of female breast NOS |
| M289141019                        | Malignant neoplasm of central part of female breast         | B341.00                | Malignant neoplasm of central part of female breast         |
| M289142014                        | Malignant neoplasm of upper-inner quadrant of female breast | B342.00                | Malignant neoplasm of upper-inner quadrant of female breast |
| M289143016                        | Malignant neoplasm of lower-inner quadrant of female breast | B343.00                | Malignant neoplasm of lower-inner quadrant of female breast |
| M289144010                        | Malignant neoplasm of upper-outer quadrant of female breast | B344.00                | Malignant neoplasm of upper-outer quadrant of female breast |
| M289145011                        | Malignant neoplasm of lower-outer quadrant of female breast | B345.00                | Malignant neoplasm of lower-outer quadrant of female breast |
| M289146012                        | Malignant neoplasm of axillary tail of female breast        | B346.00                | Malignant neoplasm of axillary tail of female breast        |
| M289147015                        | Malignant neoplasm; overlapping lesion of breast            | B347.00                | Malignant neoplasm, overlapping lesion of breast            |
| M289148013                        | Malignant neoplasm of other site of female breast           | B34y000                | Malignant neoplasm of ectopic site of female breast         |
| M289150017                        | Malignant neoplasm of other site of female breast NOS       | B34y.00                | Malignant neoplasm of other site of female breast           |
| M289151018                        | Malignant neoplasm of female breast NOS                     | B34yz00                | Malignant neoplasm of other site of female breast NOS       |
| M880331000006115                  | Ca breast - NOS                                             | B34z.00                | Malignant neoplasm of female breast NOS                     |
| M292137017                        | Malignant tumour of breast                                  | B34z.99                | CA breast - NOS                                             |
| M289149017                        | Malignant neoplasm of ectopic site of female breast         | Byu6.00                | [X]Malignant neoplasm of breast                             |
| M459378019                        | Local recurrence of malignant tumour of breast              | B36..00                | Local recurrence of malignant tumour of breast              |
| M291299010                        | Neoplasm of breast                                          | B933.11                | Cystosarcoma phyllodes                                      |
| M118291012                        | Cystosarcoma phyllodes                                      | B342.99                | CA Breast – upper – inner quadrant                          |
| M292137017                        | Malignant tumour of breast                                  | B343.99                | CA Breast – lower – inner quadrant                          |

|                              |                                                              |                               |                                                              |
|------------------------------|--------------------------------------------------------------|-------------------------------|--------------------------------------------------------------|
| M880281000006112             | Ca breast-upper;inner quadrant                               | B344.99                       | CA breast – upper – outer quadrant                           |
| M880291000006110             | Ca breast-lower;inner quadrant                               | B345.99                       | CA breast – lower – outer quadrant                           |
| M880301000006111             | Ca breast-upper;outer quadrant                               | B346.99                       | CA breast – axillary tail                                    |
| M880311000006114             | Ca breast-lower;outer quadrant                               | BB9J.00                       | [M]Paget's disease, mammary                                  |
| M880321000006118             | Ca breast - axillary tail                                    | BB9J.11                       | [M]Paget's disease, breast                                   |
| M314711000006117             | Mammary Pagets disease                                       | BB9K.00                       | [M]Paget's disease and infiltrating breast duct carcinoma    |
| M314691000006115             | Pagets disease of breast                                     | BB9K000                       | [M]Paget's disease and intraductal carcinoma of breast       |
| M1231363012                  | [M]Pagets disease and intraductal carcinoma of breast        | BB9F.00                       | [M]Lobular carcinoma NOS                                     |
|                              |                                                              | BB9G.00                       | [M]Infiltrating ductular carcinoma                           |
|                              |                                                              | BB9z.00                       | [M]Ductal, lobular or medullary neoplasm NOS                 |
|                              |                                                              | BB9..00                       | [M]Ductal, lobular and medullary neoplasms                   |
|                              |                                                              | BB90.00                       | [M]Intraductal carcinoma, noninfiltrating NOS                |
|                              |                                                              | BB91.00                       | [M]Infiltrating duct carcinoma                               |
|                              |                                                              | BB91.11                       | [M]Duct carcinoma NOS                                        |
|                              |                                                              | BB91000                       | [M]Intraductal papillary adenocarcinoma with invasion        |
|                              |                                                              | BB91100                       | [M]Infiltrating duct and lobular carcinoma                   |
|                              |                                                              | BB94.00                       | [M]Juvenile breast carcinoma                                 |
|                              |                                                              | BB94.11                       | [M]Secretory breast carcinoma                                |
|                              |                                                              | BB96.00                       | [M]Noninfiltrating intraductal papillary adenocarcinoma      |
|                              |                                                              | BBM8.00                       | [M]Cystosarcoma phyllodes NOS                                |
|                              |                                                              | BBM9.00                       | [M]Cystosarcoma phyllodes, malignant                         |
| <b>Mastectomy</b>            |                                                              |                               |                                                              |
| <b>CPRD Aurum - Medcodes</b> |                                                              | <b>CPRD GOLD – Read codes</b> |                                                              |
| M97901000006114              | Total mastectomy                                             | 7130.00                       | Total mastectomy operations                                  |
| M97251000006115              | Total excision of breast operations                          | 7130.11                       | Total excision of breast operations                          |
| M97851000006116              | Total mastectomy & excision pectoral muscs & part chest wall | 7130000                       | Total mastectomy & excision pectoral muscs & part chest wall |
| M266402016                   | Total mastectomy and excision of both pectoral muscles NEC   | 7130100                       | Total mastectomy and excision of both pectoral muscles NEC   |
| M97871000006114              | Total mastectomy and excision of pectoralis minor muscle     | 7130200                       | Total mastectomy and excision of pectoralis minor muscle     |
| M266403014                   | Total mastectomy NEC                                         | 7130300                       | Total mastectomy NEC                                         |
| M116564019                   | Subcutaneous mastectomy                                      | 7130400                       | Subcutaneous mastectomy                                      |
| M410874017                   | Radical mastectomy including axillary lymph nodes            | 7130500                       | Radical mastectomy including axillary lymph nodes            |
| M1479045012                  | Radical mastectomy                                           | 7130512                       | Radical mastectomy                                           |

|                   |                                                                                                      |         |                                  |
|-------------------|------------------------------------------------------------------------------------------------------|---------|----------------------------------|
| M266409013        | Simple mastectomy                                                                                    | 7130600 | Simple mastectomy                |
| M46639019         | Bilateral mastectomy                                                                                 | 7130800 | Bilateral mastectomy             |
| M2158157014       | Modified radical mastectomy                                                                          | 7130900 | Modified radical mastectomy      |
| M362611000000110  | Skin sparing mastectomy                                                                              | 7130A00 | Skin-sparing mastectomy          |
| M266413018        | Other specified total mastectomy                                                                     | 7130y00 | Other specified total mastectomy |
| M266414012        | Total mastectomy NOS                                                                                 | 7130z00 | Total mastectomy NOS             |
| M1221495018       | Mastectomy                                                                                           | 7131.11 | Other mastectomy operations      |
| M393926011        | Partial mastectomy                                                                                   | 7131100 | Partial mastectomy NEC           |
| M815281000006116  | Halsted radical mastectomy                                                                           | 7130511 | Halsted radical mastectomy       |
| M2692391012       | Mastectomy of left breast                                                                            | 7130C00 | Mastectomy of left breast        |
| M2692806017       | Mastectomy of right breast                                                                           | 7130B00 | Mastectomy of right breast       |
| M638611000006118  | Elephantiasis-postmastectomy                                                                         | G860.11 | Elephantiasis-postmastectomy     |
| M858671000006116  | Subcut.mastect.+prosth.implant                                                                       | 7130499 | SUBCUT.MASTECT.+PROSTH.IMPLANT   |
| M474933010        | Extended radical mastectomy                                                                          |         |                                  |
| M988531000006117  | Mastectomy                                                                                           |         |                                  |
| M858641000006112  | Mastectomy                                                                                           |         |                                  |
| M858691000006115  | Mastectomy NOS                                                                                       |         |                                  |
| M858661000006111  | Extended simple mastectomy                                                                           |         |                                  |
| M932581000006111  | Extended simple mastectomy                                                                           |         |                                  |
| M3524713018       | Partial mastectomy of right breast                                                                   |         |                                  |
| M3524716014       | Partial mastectomy of left breast                                                                    |         |                                  |
| M3524718010       | Right subtotal mastectomy                                                                            |         |                                  |
| M3524719019       | Left subtotal mastectomy                                                                             |         |                                  |
| M3524780010       | Reconstruction of breast using myocutaneous flap with microvascular anastomosis following mastectomy |         |                                  |
| M3542823010       | Simple mastectomy of left breast                                                                     |         |                                  |
| M3542825015       | Simple mastectomy of right breast                                                                    |         |                                  |
| M3542843016       | Subcutaneous mastectomy of left breast with prosthetic implant                                       |         |                                  |
| M3542844010       | Subcutaneous mastectomy of right breast with prosthetic implant                                      |         |                                  |
| M2629561000006110 | Unilateral radical mastectomy                                                                        |         |                                  |
| M2732661000006110 | Bilateral subcutaneous mastectomy                                                                    |         |                                  |
| M2732671000006115 | Bilateral mastectomy with preservation of skin and nipple                                            |         |                                  |
| M2733091000006117 | Bilateral mastectomy with excision of bilateral regional lymph nodes                                 |         |                                  |

|                   |                                                                          |  |
|-------------------|--------------------------------------------------------------------------|--|
| M2771211000006119 | Modified radical mastectomy - bilateral                                  |  |
| M2857171000006113 | Bilateral simple mastectomy                                              |  |
| M2866101000006113 | Unilateral simple mastectomy                                             |  |
| M2866111000006111 | Simple mastectomy                                                        |  |
| M3547031000006119 | Subtotal mastectomy                                                      |  |
| M3579731000006114 | Mastectomy with excision of regional lymph nodes                         |  |
| M3579741000006116 | Unilateral simple mastectomy with regional lymphadenectomy               |  |
| M3641121000006116 | Unilateral mastectomy with preservation of skin and nipple               |  |
| M3641141000006111 | Nipple preserving subcutaneous mastectomy                                |  |
| M3675541000006119 | Unilateral modified radical mastectomy                                   |  |
| M3675551000006117 | Modified radical mastectomy - unilateral                                 |  |
| M3692861000006116 | Unilateral mastectomy                                                    |  |
| M3743871000006115 | Bilateral radical mastectomy                                             |  |
| M3942391000006113 | Unilateral extended simple mastectomy                                    |  |
| M3942401000006110 | Unilateral mastectomy extended simple                                    |  |
| M4647121000006113 | SM - Simple mastectomy                                                   |  |
| M5106281000006115 | Total mastectomy and excision of part of pectoral muscles and chest wall |  |
| M5726301000006119 | Subcutaneous mastectomy and prosthetic implant                           |  |
| M5726311000006116 | Extended simple mastectomy                                               |  |
| M6062141000006114 | Unilateral subcutaneous mastectomy with synchronous implant              |  |
| M6068501000006119 | Mastectomy with preservation of skin and nipple with synchronous implant |  |
| M6205641000006119 | Radical mastectomy including pectoral muscles and axillary lymph nodes   |  |
| M6205701000006111 | Urban operation - extended radical mastectomy                            |  |
| M6205761000006112 | Halsted mastectomy                                                       |  |
| M6557611000006110 | Patey total mastectomy                                                   |  |
| M7319261000006112 | Total mastectomy and axillary dissection                                 |  |
| M7319271000006117 | Simple mastectomy with excision of axillary lymph nodes                  |  |
| M7324241000006119 | Total mastectomy and axillary clearance                                  |  |
| M7324251000006117 | Simple mastectomy with complete axillary lymphadenectomy                 |  |
| M7335291000006110 | Simple mastectomy with axillary lymph node sampling                      |  |
| M7335791000006117 | Mastectomy and axillary clearance                                        |  |
| M7878881000006119 | Subcutaneous mastectomy of right breast                                  |  |

|                                                                                                                                                                                                                                                                                                                                                                                                                                                                                                                                                                                                                                                                                                                 |                                             |                                                                                                                                                                                                                                                                                                                                                                                                                                                                                                                                                                                                                                                                                                                                                                                                                                                                                                                                                                                                                                                                                                                                                                                                                                                                                                                                                                                                                                           |
|-----------------------------------------------------------------------------------------------------------------------------------------------------------------------------------------------------------------------------------------------------------------------------------------------------------------------------------------------------------------------------------------------------------------------------------------------------------------------------------------------------------------------------------------------------------------------------------------------------------------------------------------------------------------------------------------------------------------|---------------------------------------------|-------------------------------------------------------------------------------------------------------------------------------------------------------------------------------------------------------------------------------------------------------------------------------------------------------------------------------------------------------------------------------------------------------------------------------------------------------------------------------------------------------------------------------------------------------------------------------------------------------------------------------------------------------------------------------------------------------------------------------------------------------------------------------------------------------------------------------------------------------------------------------------------------------------------------------------------------------------------------------------------------------------------------------------------------------------------------------------------------------------------------------------------------------------------------------------------------------------------------------------------------------------------------------------------------------------------------------------------------------------------------------------------------------------------------------------------|
| M7878891000006116                                                                                                                                                                                                                                                                                                                                                                                                                                                                                                                                                                                                                                                                                               | Subcutaneous mastectomy of left breast      |                                                                                                                                                                                                                                                                                                                                                                                                                                                                                                                                                                                                                                                                                                                                                                                                                                                                                                                                                                                                                                                                                                                                                                                                                                                                                                                                                                                                                                           |
| M7878901000006117                                                                                                                                                                                                                                                                                                                                                                                                                                                                                                                                                                                                                                                                                               | Modified radical mastectomy of right breast |                                                                                                                                                                                                                                                                                                                                                                                                                                                                                                                                                                                                                                                                                                                                                                                                                                                                                                                                                                                                                                                                                                                                                                                                                                                                                                                                                                                                                                           |
| M7878911000006119                                                                                                                                                                                                                                                                                                                                                                                                                                                                                                                                                                                                                                                                                               | Modified radical mastectomy of left breast  |                                                                                                                                                                                                                                                                                                                                                                                                                                                                                                                                                                                                                                                                                                                                                                                                                                                                                                                                                                                                                                                                                                                                                                                                                                                                                                                                                                                                                                           |
| M7881061000006116                                                                                                                                                                                                                                                                                                                                                                                                                                                                                                                                                                                                                                                                                               | Prophylactic bilateral mastectomy           |                                                                                                                                                                                                                                                                                                                                                                                                                                                                                                                                                                                                                                                                                                                                                                                                                                                                                                                                                                                                                                                                                                                                                                                                                                                                                                                                                                                                                                           |
| M12759271000006114                                                                                                                                                                                                                                                                                                                                                                                                                                                                                                                                                                                                                                                                                              | Other mastectomy operations                 |                                                                                                                                                                                                                                                                                                                                                                                                                                                                                                                                                                                                                                                                                                                                                                                                                                                                                                                                                                                                                                                                                                                                                                                                                                                                                                                                                                                                                                           |
| <b>Breast Cancer Drugs</b>                                                                                                                                                                                                                                                                                                                                                                                                                                                                                                                                                                                                                                                                                      |                                             |                                                                                                                                                                                                                                                                                                                                                                                                                                                                                                                                                                                                                                                                                                                                                                                                                                                                                                                                                                                                                                                                                                                                                                                                                                                                                                                                                                                                                                           |
| <b>CPRD Aurum - ProdCodes</b>                                                                                                                                                                                                                                                                                                                                                                                                                                                                                                                                                                                                                                                                                   |                                             | <b>CPRD GOLD – Gemscript codes</b>                                                                                                                                                                                                                                                                                                                                                                                                                                                                                                                                                                                                                                                                                                                                                                                                                                                                                                                                                                                                                                                                                                                                                                                                                                                                                                                                                                                                        |
| <p><i>Tamoxifen</i><br/>514541000033113, 986741000033119, 988741000033118, 1408141000033119, 1408241000033114, 1408541000033111, 1408641000033112, 1408741000033115, 1408841000033113, 1409141000033113, 1409241000033118, 1900841000033113, 1900941000033117, 514641000033114, 988841000033111</p> <p><i>Anastrozole</i><br/>70141000033119, 80841000033116, 6112541000033112, 13146241000033111</p> <p><i>Letrozole</i><br/>572641000033111, 825841000033116</p> <p><i>Exemestane</i><br/>1991941000033113, 1992041000033119</p> <p><i>Fulvestrant</i><br/>3076841000033117, 3076941000033113</p> <p><i>Formestane</i><br/>600541000033112, 562841000033119</p> <p><i>Toremifene</i><br/>1451341000033118</p> |                                             | <p><i>Tamoxifen</i><br/>634009, 634010, 634011, 635009, 635010, 635011, 636009, 636010, 636011, 654001, 1300001, 1301001, 1353010, 1353011, 1354009, 1354010, 1354011, 1976009, 2281009, 2281010, 2281011, 2627001, 2628001, 2629001, 2906009, 2906010, 2906011, 3166009, 3166010, 3166011, 3642009, 3642010, 3865001, 4351007, 4407009, 4758009, 4759009, 4782001, 4782002, 4782003, 4783001, 4783002, 4809007, 4810007, 5505001, 5505002, 7070001, 7070002, 7070003, 7542020, 7543020, 7550020, 8780001, 8780002, 8780003, 11039001, 34518020, 34520020, 47537020, 50664020, 50665020, 50675020, 50747020, 53266020, 53270020, 53480020, 53481020, 53486020, 57131020, 57132020, 58407020, 58410020, 58413020, 59521020, 60635020, 62641020, 63522020, 65529020, 66868020, 66869020, 66870020, 66873020, 66874020, 69491020, 69492020, 74883020, 74884020, 74885020, 79824020, 79825020, 79826020, 84701020</p> <p><i>Anastrozole</i><br/>7640020, 7642020, 8867001, 8868001, 18435001, 39877020, 77385021, 77914020, 77945020, 80029020, 80031020, 99564020</p> <p><i>Letrozole</i><br/>7649020, 7650020, 10572001, 10573001, 39879020, 78127020, 78223020, 83693020, 83695020</p> <p><i>Exemestane</i><br/>7654020, 10167001, 10168001, 39880020, 78220020, 82779020, 82781020</p> <p><i>Fulvestrant</i><br/>87792020, G87794020</p> <p><i>Formestane</i><br/>74278020, 74281020,</p> <p><i>Toremifene</i><br/>82785020, 82796020</p> |

**Source Population:**

- Female had malignant breast cancer diagnosis, mastectomy, and/or breast cancer drug prescription) recorded during study period (1/1/2004 – 6/30/2019).
- Eligible date defined as first of the eligible events during the study period.
- Patients followed from the start of the electronic record or 1/1/2004 (whichever came later) to end of electronic record of 6/30/2019 (whichever came first)

**Excluded patients where:**

- A. Malignant cancer diagnosis (except non-melanoma skin or breast cancer) before eligible date
- B. Malignant breast cancer diagnosis before eligible date
- C. Mastectomy before eligible date
- D. Breast cancer drug prescription before eligible date
- E. Eligible date before or after the patient's follow up

**Final Study Population**

**CPRD Aurum**

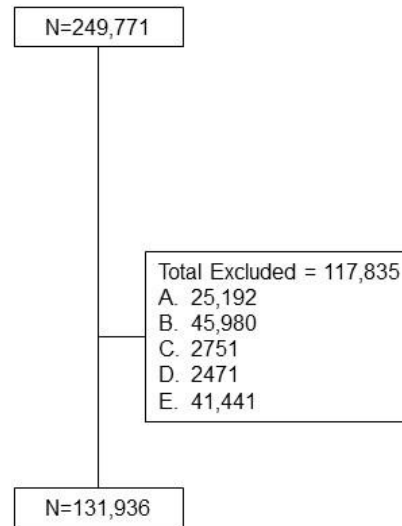

**CPRD GOLD**

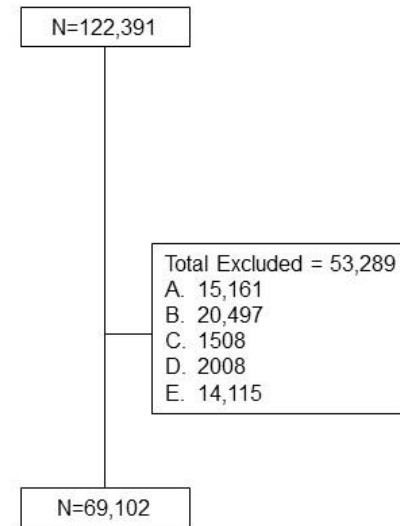

Supplementary Figure 1. Study Population Selection
